# Supplementary material for: The complex relationship between body mass index and response to immune checkpoint inhibition in metastatic melanoma patients
Source: PubMed Central journal article supplement (PMC6700794; doi:10.1186/s40425-019-0699-5), 2019-08-19
Supplement: 40425_2019_699_MOESM1_ESM.pdf [file 40425_2019_699_MOESM1_ESM.pdf]

|                     |                                                | PFS             |        | OS              |        |
|---------------------|------------------------------------------------|-----------------|--------|-----------------|--------|
|                     |                                                | HR (95% CI)     | Pvalue | HR (95% CI)     | Pvalue |
| Univariate Model    | Overweight (vs Normal BMI)                     | 1.02(0.68,1.52) | 0.92   | 1.05(0.68,1.62) | 0.82   |
|                     | Obesity (vs Normal BMI)                        | 0.9(0.6,1.35)   | 0.62   | 0.92(0.58,1.46) | 0.73   |
| Multivariable Model | Overweight (vs Normal BMI)                     | 1.16(0.75,1.81) | 0.5    | 1.05(0.67,1.66) | 0.82   |
|                     | Obesity (vs Normal BMI)                        | 1.33(0.87,2.02) | 0.19   | 1.2(0.73,1.99)  | 0.47   |
|                     | Female                                         | 1.03(0.74,1.46) | 0.85   | 0.64(0.41,1)    | 0.05   |
|                     | Age at Treatment Initiation                    | 1(0.99,1.01)    | 0.85   | 1(0.99,1.02)    | 0.54   |
|                     | Stage IV at Treatment Initiation(vs Stage III) | 1.63(0.73,3.65) | 0.23   | 2.73(1.02,7.28) | 0.05   |
|                     | ECOG Status                                    | 1.94(1.44,2.61) | <0.001 | 2.28(1.76,2.96) | <0.001 |
|                     | LDH High                                       | 0.75(0.51,1.1)  | 0.14   | 0.51(0.35,0.75) | <0.001 |
|                     | Number of Metastatic Sites                     | 1.58(1.03,2.42) | 0.04   | 1.22(0.77,1.94) | 0.4    |
|                     | BRAF Mutated                                   | 1.13(1,1.28)    | 0.04   | 1.08(0.94,1.23) | 0.29   |
